# Supplementary material for: Characterisation of Cdc25B localisation and nuclear export during the cell cycle and in response to stress
Source: Oxford University Press journal article supplement (doi:10.1242/jcs.01395), 2004-09-29
Supplement: jcs01395-sup-figs1.pdf [file jcs01395-sup-figs1.pdf]

## Supplementary figure 1

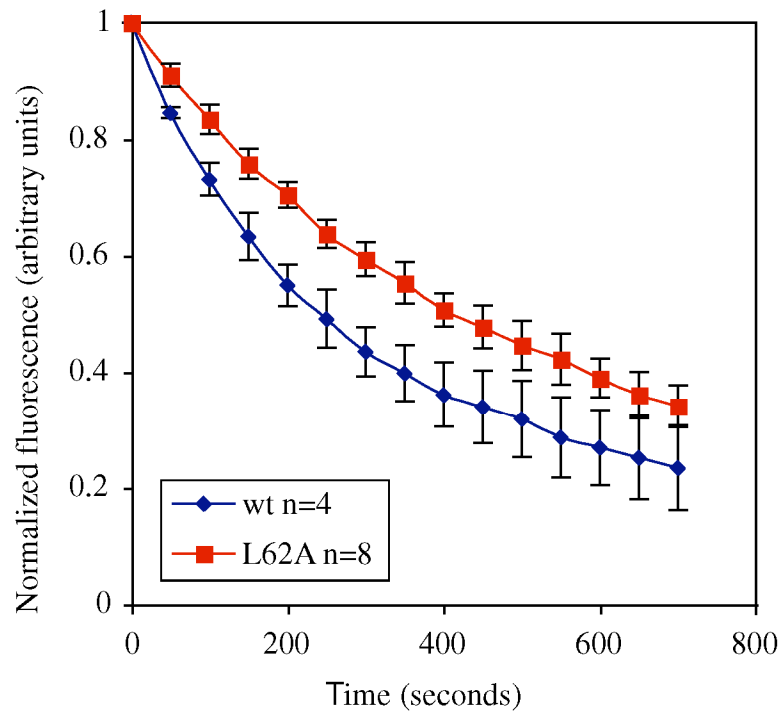

Mutation of NES2 reduces the export rate of Cdc25B3 in G2. Fluorescence loss in photobleaching (FLIP) of YFP-Cdc25B3 and YFP-Cdc25B3(L62A) in G2 HeLa cells. Cells were synchronised with thymidine, released and microinjected with expression vectors five hours after release. Three hours later, the FLIP assay was performed as described for G1 cells. The nuclear fluorescence of the bleached cells was quantified. After background subtraction, the value of nuclear fluorescence at the start of the experiment was normalised to 1.
