# Supplementary material for: Characterisation of Cdc25B localisation and nuclear export during the cell cycle and in response to stress
Source: Oxford University Press journal article supplement (doi:10.1242/jcs.01395), 2004-09-29
Supplement: jcs01395-sup-figs2.pdf [file jcs01395-sup-figs2.pdf]

## Supplementary figure 2

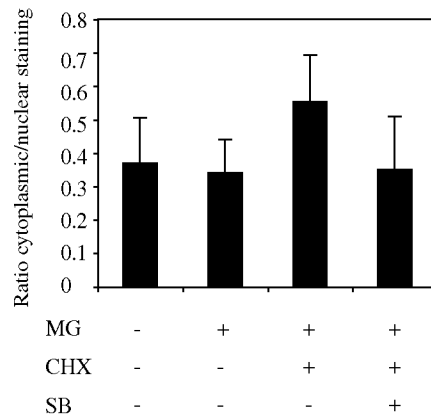

Endogenous Cdc25B partly translocates to the cytoplasm after treatment with cycloheximide. When treating cells with cycloheximide for 1 hour, both the nuclear and cytoplasmic staining was greatly reduced indicating a short half-life of endogenous Cdc25B. Therefore, to be able to study the localisation pattern changes we added the proteasome inhibitor MG132 to the cells. HeLa cells were treated for two hours with or without MG132 (MG) and SB202190 (SB), and for 1 hour with or without cycloheximide (CHX) as indicated. The nuclear and cytoplasmic B1:5 (Cdc25B) fluorescence of Cyclin B1 positive cells from deconvolution images was quantified, the background was subtracted and the cytoplasmic signal was divided with the nuclear signal. Cycloheximide (Labora) was used at 100 µg/ml. MG132 and SB202190 were used at 2 µg/ml and 10 µM respectively.
